# Supplementary material for: Evaluation of data availability on population health indicators at the regional level across the European Union
Source: PubMed Central journal article supplement (PMC6686464; doi:10.1186/s12963-019-0188-6), 2019-08-07
Supplement: 12963_2019_188_MOESM1_ESM.pdf [file 12963_2019_188_MOESM1_ESM.pdf]

## Additional file 1: Data completeness flowchart

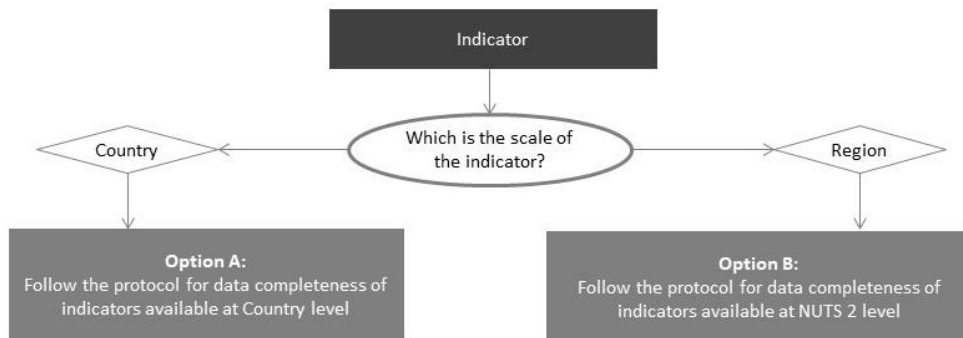

### Option A: Protocol for data completeness of indicators available at Country level:

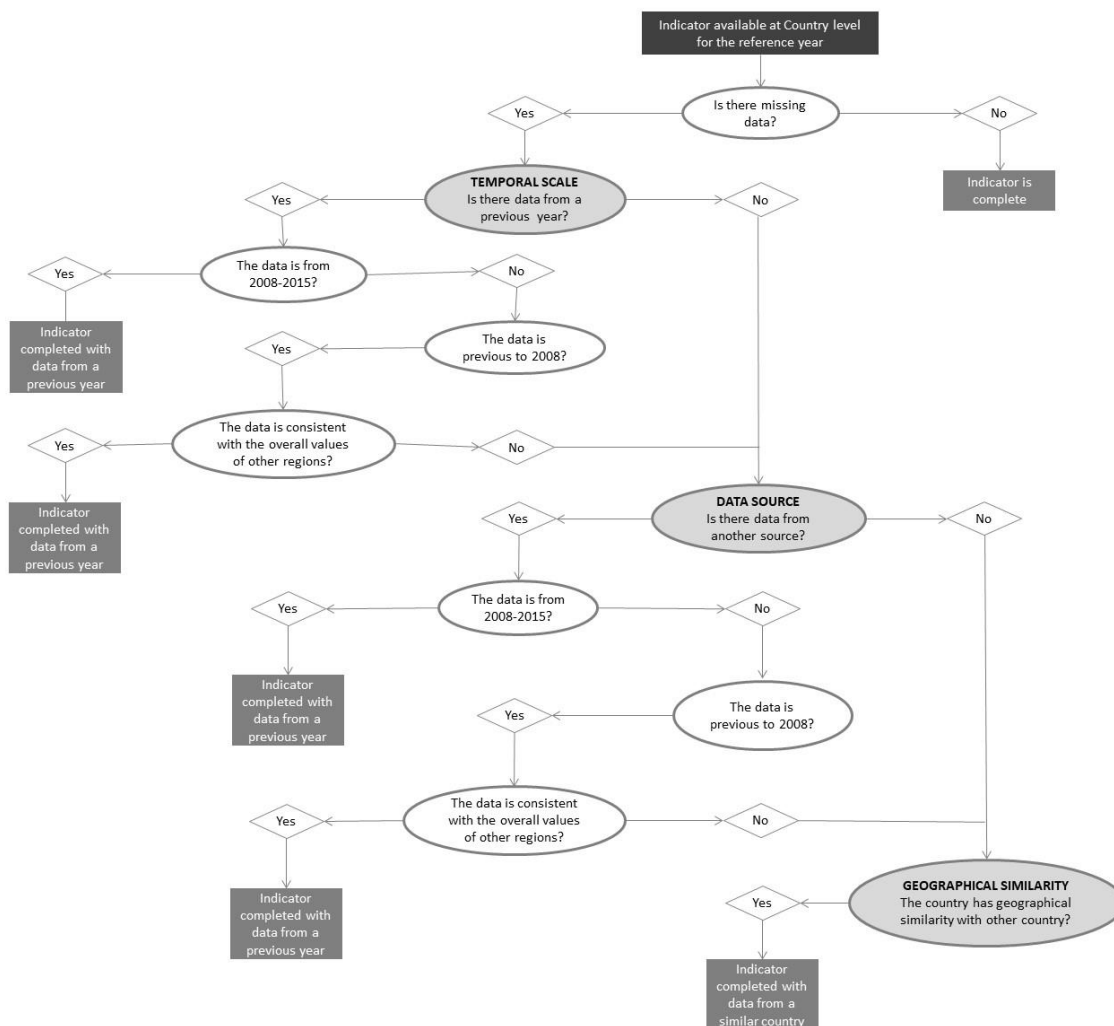

Option B: Protocol for data completeness of indicators available at Regional level:

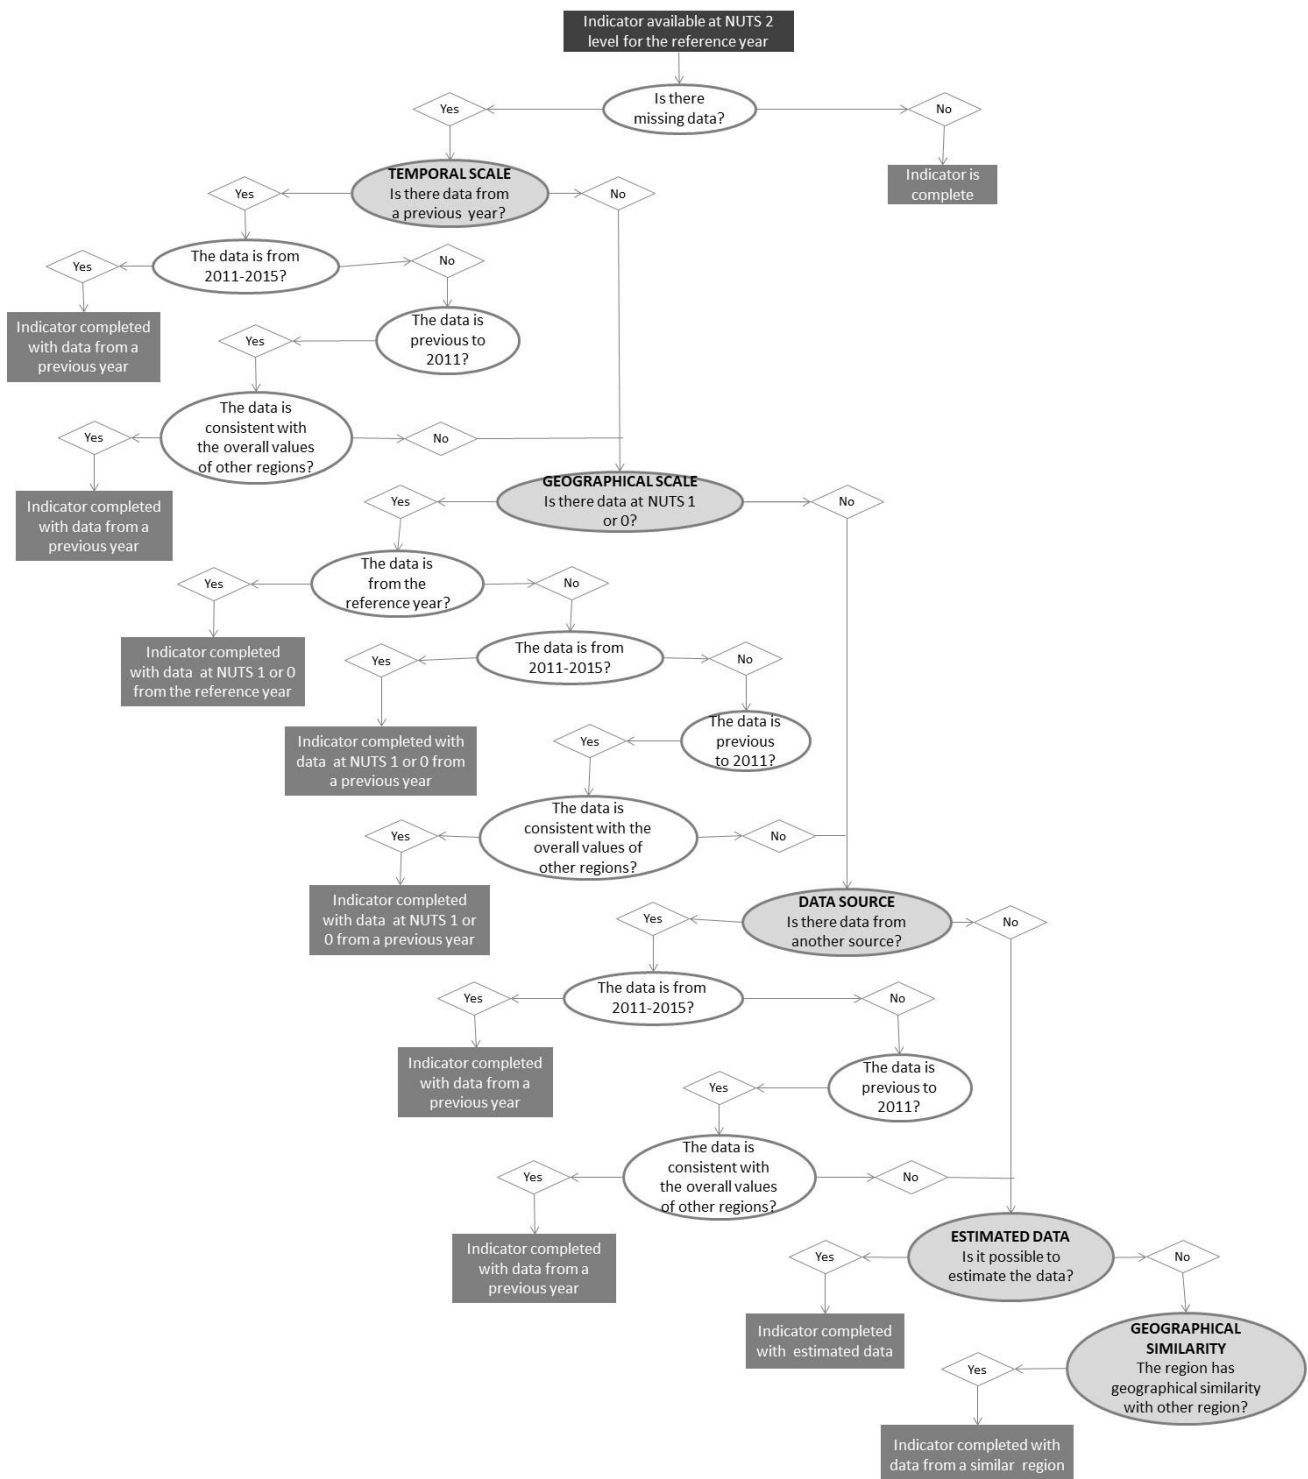

Legend: The grey circles represent the criteria used to complete the data. The white circles represent the subsequent question used to complete the data. The white triangle represents the answer to the previous question (yes or no). The grey squares represent the decision made to complete the data.
