# Supplementary material for: Evaluation of data availability on population health indicators at the regional level across the European Union
Source: PubMed Central journal article supplement (PMC6686464; doi:10.1186/s12963-019-0188-6), 2019-08-07
Supplement: 12963_2019_188_MOESM2_ESM.pdf [file 12963_2019_188_MOESM2_ESM.pdf]

**Additional File 2: Indicator availability score of the EURO-HEALTHY PHI indicators.**

| Area of Concern               | Indicator                   | Data availability score                                                        |                                                                                 |                |              |            | Final Score |             |             |
|-------------------------------|-----------------------------|--------------------------------------------------------------------------------|---------------------------------------------------------------------------------|----------------|--------------|------------|-------------|-------------|-------------|
|                               |                             | Group I                                                                        |                                                                                 | Group II       |              |            |             |             |             |
|                               |                             | 1. NUTS 2 level                                                                | 2. Reference year                                                               | 3. Data source | 4. Estimated | 5. Similar |             |             |             |
| HEALTH DETERMINANTS COMPONENT | <b>ECONOMIC CONDITIONS</b>  | <b>Dimension: Employment</b>                                                   | <b>0.8</b>                                                                      | <b>0.9</b>     | <b>1.0</b>   | <b>0.9</b> | <b>1.0</b>  | <b>0.92</b> |             |
|                               |                             | Unemployment rate (%)                                                          | 0.8                                                                             | 1.0            | 1.0          | 1.0        | 1.0         | 0.95        |             |
|                               |                             | Long-term unemployment rate - 12 months and more (%)                           | 0.8                                                                             | 0.8            | 1.0          | 0.8        | 1.0         | 0.88        |             |
|                               |                             | <b>Dimension: Income and living conditions</b>                                 | <b>0.3</b>                                                                      | <b>0.8</b>     | <b>0.9</b>   | <b>1.0</b> | <b>1.0</b>  | <b>0.78</b> |             |
|                               |                             | Disposable income of private households per capita (Euro per inhabitant)       | 0.8                                                                             | 0.8            | 0.8          | 1.0        | 1.0         | 0.86        |             |
|                               |                             | People at risk of poverty or social exclusion (%)                              | 0.2                                                                             | 0.8            | 1.0          | 1.0        | 1.0         | 0.77        |             |
|                               |                             | Disposable income ratio - S80/S20 (ratio)                                      | 0.0                                                                             | 0.8            | 1.0          | 1.0        | 1.0         | 0.72        |             |
|                               |                             | <b>Dimension: Social protection</b>                                            | <b>0.0</b>                                                                      | <b>1.0</b>     | <b>1.0</b>   | <b>1.0</b> | <b>0.8</b>  | <b>0.74</b> |             |
|                               |                             | Expenditure on care for elderly (% of GDP)                                     | 0.0                                                                             | 1.0            | 1.0          | 1.0        | 0.8         | 0.74        |             |
|                               |                             | <b>Dimension: Security</b>                                                     | <b>0.6</b>                                                                      | <b>1.0</b>     | <b>1.0</b>   | <b>1.0</b> | <b>1.0</b>  | <b>0.91</b> |             |
|                               |                             | Crimes recorded by the police per 100,000 inhabitants                          | 0.6                                                                             | 1.0            | 1.0          | 1.0        | 1.0         | 0.91        |             |
|                               |                             | <b>EDUCATION</b>                                                               | <b>Dimension: Education</b>                                                     | <b>1.0</b>     | <b>0.8</b>   | <b>1.0</b> | <b>0.9</b>  | <b>1.0</b>  | <b>0.94</b> |
|                               |                             |                                                                                | Population aged 25-64 with upper secondary or tertiary education attainment (%) | 1.0            | 0.8          | 1.0        | 1.0         | 1.0         | 0.95        |
|                               |                             |                                                                                | Early leavers from education and training (%)                                   | 1.0            | 0.8          | 1.0        | 0.8         | 1.0         | 0.92        |
|                               |                             | <b>DEMOGRAPHIC CHANGE</b>                                                      | <b>Dimension: Ageing</b>                                                        | <b>0.5</b>     | <b>0.9</b>   | <b>1.0</b> | <b>1.0</b>  | <b>1.0</b>  | <b>0.86</b> |
|                               |                             |                                                                                | At risk of poverty rate of older people - aged 65 years or over (%)             | 0.0            | 0.8          | 1.0        | 1.0         | 1.0         | 0.72        |
|                               |                             |                                                                                | Ageing index (ratio)                                                            | 1.0            | 1.0          | 1.0        | 1.0         | 1.0         | 1.00        |
|                               |                             | <b>LIFESTYLE AND HEALTH BEHAVIOURS</b>                                         | <b>Dimension: Lifestyle and Health Behaviours</b>                               | <b>0.3</b>     | <b>0.5</b>   | <b>0.9</b> | <b>1.0</b>  | <b>1.0</b>  | <b>0.69</b> |
|                               |                             | Adults who are obese (%)                                                       | 0.0                                                                             | 0.6            | 0.8          | 1.0        | 1.0         | 0.63        |             |
|                               |                             | Daily smokers - aged 15 and over (%)                                           | 0.0                                                                             | 0.4            | 0.8          | 1.0        | 1.0         | 0.58        |             |
|                               |                             | Pure alcohol consumption - aged 15 and over (Liters per capita)                | 0.0                                                                             | 0.2            | 1.0          | 1.0        | 1.0         | 0.58        |             |
|                               |                             | Live births by mothers under age of 20 (%)                                     | 1.0                                                                             | 0.8            | 1.0          | 1.0        | 1.0         | 0.95        |             |
|                               | <b>PHYSICAL ENVIRONMENT</b> | <b>Dimension: Pollution</b>                                                    | <b>0.7</b>                                                                      | <b>0.9</b>     | <b>0.9</b>   | <b>1.0</b> | <b>1.0</b>  | <b>0.86</b> |             |
|                               |                             | Annual mean of the daily PM <sub>2.5</sub> concentrations (ug/m <sup>3</sup> ) | 1.0                                                                             | 0.8            | 0.8          | 1.0        | 1.0         | 0.91        |             |
|                               |                             | Annual mean of the daily PM <sub>10</sub> concentrations (ug/m <sup>3</sup> )  | 1.0                                                                             | 0.8            | 0.8          | 1.0        | 1.0         | 0.91        |             |
|                               |                             | Greenhouse Gas (GHG), total tonnes of CO2 eq. emissions per annum per capita   | 0.0                                                                             | 1.0            | 1.0          | 1.0        | 1.0         | 0.77        |             |
|                               | <b>ENVIRONMENT</b>          | <b>Dimension: Housing conditions</b>                                           | <b>0.6</b>                                                                      | <b>0.6</b>     | <b>0.9</b>   | <b>1.0</b> | <b>0.9</b>  | <b>0.77</b> |             |
|                               |                             | Average number of rooms per person                                             | 0.2                                                                             | 0.2            | 0.8          | 1.0        | 1.0         | 0.58        |             |

| Area of Concern                      | Indicator                                                                                                  | Data availability score |                   |                |              |            | Final Score |
|--------------------------------------|------------------------------------------------------------------------------------------------------------|-------------------------|-------------------|----------------|--------------|------------|-------------|
|                                      |                                                                                                            | Group I                 |                   |                | Group II     |            |             |
|                                      |                                                                                                            | 1. NUTS 2 level         | 2. Reference year | 3. Data source | 4. Estimated | 5. Similar |             |
|                                      | Households without indoor flushing toilet (%)                                                              | 0.8                     | 0.8               | 0.8            | 1.0          | 1.0        | 0.86        |
|                                      | Households without central heating (%)                                                                     | 0.8                     | 0.8               | 1.0            | 1.0          | 0.8        | 0.88        |
|                                      | <b>Dimension: Water and sanitation</b>                                                                     | <b>0.1</b>              | <b>0.2</b>        | <b>0.6</b>     | <b>1.0</b>   | <b>1.0</b> | <b>0.50</b> |
|                                      | Population connected to wastewater treatment plants (%)                                                    | 0.0                     | 0.2               | 0.8            | 1.0          | 1.0        | 0.53        |
|                                      | Population connected to public water supply (%)                                                            | 0.2                     | 0.2               | 0.4            | 1.0          | 1.0        | 0.34        |
|                                      | <b>Dimension: Waste management</b>                                                                         | <b>0.0</b>              | <b>1.0</b>        | <b>1.0</b>     | <b>1.0</b>   | <b>1.0</b> | <b>0.77</b> |
|                                      | Recycling rate of municipal waste (%)                                                                      | 0.0                     | 1.0               | 1.0            | 1.0          | 1.0        | 0.77        |
| ROAD SAFETY                          | <b>Dimension: ROAD SAFETY</b>                                                                              | <b>1.0</b>              | <b>0.8</b>        | <b>1.0</b>     | <b>1.0</b>   | <b>1.0</b> | <b>0.95</b> |
|                                      | Victims in road accidents - injured and killed per 100,000 inhabitants                                     | 1.0                     | 0.8               | 1.0            | 1.0          | 1.0        | 0.95        |
|                                      | Fatality rate due to road traffic accidents per 1,000 victims                                              | 1.0                     | 0.8               | 1.0            | 1.0          | 1.0        | 0.95        |
| HEALTHCARE RESOURCES AND EXPENDITURE | <b>Dimension: Healthcare resources</b>                                                                     | <b>0.6</b>              | <b>0.8</b>        | <b>1.0</b>     | <b>1.0</b>   | <b>1.0</b> | <b>0.86</b> |
|                                      | Medical doctors per 100,000 inhabitants                                                                    | 0.6                     | 0.8               | 1.0            | 1.0          | 1.0        | 0.86        |
|                                      | Health personnel (nurses and midwives, dentists, pharmacists and physiotherapists) per 100,000 inhabitants | 0.6                     | 0.8               | 1.0            | 1.0          | 1.0        | 0.86        |
|                                      | <b>Dimension: Healthcare expenditure</b>                                                                   | <b>0.0</b>              | <b>1.0</b>        | <b>1.0</b>     | <b>1.0</b>   | <b>1.0</b> | <b>0.77</b> |
|                                      | Total health expenditure (THE). PPP\$ per capita, WHO estimates                                            | 0.0                     | 1.0               | 1.0            | 1.0          | 1.0        | 0.77        |
|                                      | Private households' out-of-pocket on health as percentage of total health expenditure (THE)                | 0.0                     | 1.0               | 1.0            | 1.0          | 1.0        | 0.77        |
|                                      | Public expenditure on health. PPP\$ per capita, WHO estimates                                              | 0.0                     | 1.0               | 1.0            | 1.0          | 1.0        | 0.77        |
| HEALTHCARE PERFORMANCE               | <b>Dimension: Healthcare performance</b>                                                                   | <b>0.6</b>              | <b>0.3</b>        | <b>0.8</b>     | <b>0.9</b>   | <b>1.0</b> | <b>0.68</b> |
|                                      | Hospital discharges due to diabetes, hypertension and asthma per 100,000 inhabitants                       | 0.4                     | 0.4               | 0.8            | 1.0          | 1.0        | 0.67        |
|                                      | Amenable deaths due to health care – standardised death rate per 100,000 inhabitants                       | 0.8                     | 0.2               | 0.8            | 0.8          | 1.0        | 0.69        |
| HEALTH OUTCOMES COMPONENT            | <b>Dimension: Mortality</b>                                                                                | <b>0.8</b>              | <b>0.7</b>        | <b>0.9</b>     | <b>0.9</b>   | <b>1.0</b> | <b>0.87</b> |
|                                      | Life expectancy at birth (years)                                                                           | 0.8                     | 1.0               | 1.0            | 1.0          | 1.0        | 0.95        |
|                                      | Infant mortality per 1,000 live births                                                                     | 0.8                     | 1.0               | 1.0            | 1.0          | 1.0        | 0.95        |
|                                      | Preventable deaths - SDR per 100,000 inhabitants                                                           | 0.8                     | 0.2               | 0.8            | 0.8          | 1.0        | 0.69        |
|                                      | <b>Dimension: Morbidity</b>                                                                                | <b>0.0</b>              | <b>1.0</b>        | <b>1.0</b>     | <b>1.0</b>   | <b>1.0</b> | <b>0.77</b> |
|                                      | Self-perceived health less than good (%)                                                                   | 0.0                     | 1.0               | 1.0            | 1.0          | 1.0        | 0.77        |
|                                      | Age-standardized Disability-Adjusted Life Year (DALY) rates                                                | 0.0                     | 1.0               | 1.0            | 1.0          | 1.0        | 0.77        |
|                                      | Low birth-weight (%)                                                                                       | 0.0                     | 1.0               | 1.0            | 1.0          | 1.0        | 0.77        |
