# Supplementary material for: Evaluation of data availability on population health indicators at the regional level across the European Union
Source: PubMed Central journal article supplement (PMC6686464; doi:10.1186/s12963-019-0188-6), 2019-08-07
Supplement: 12963_2019_188_MOESM3_ESM.pdf [file 12963_2019_188_MOESM3_ESM.pdf]

1 **Additional file 3: Map of regional availability score in the EU, by area of concern.**  
 2  
 3 **Regional availability score by area of concern: Economic conditions, social protection and**  
 4 **security**

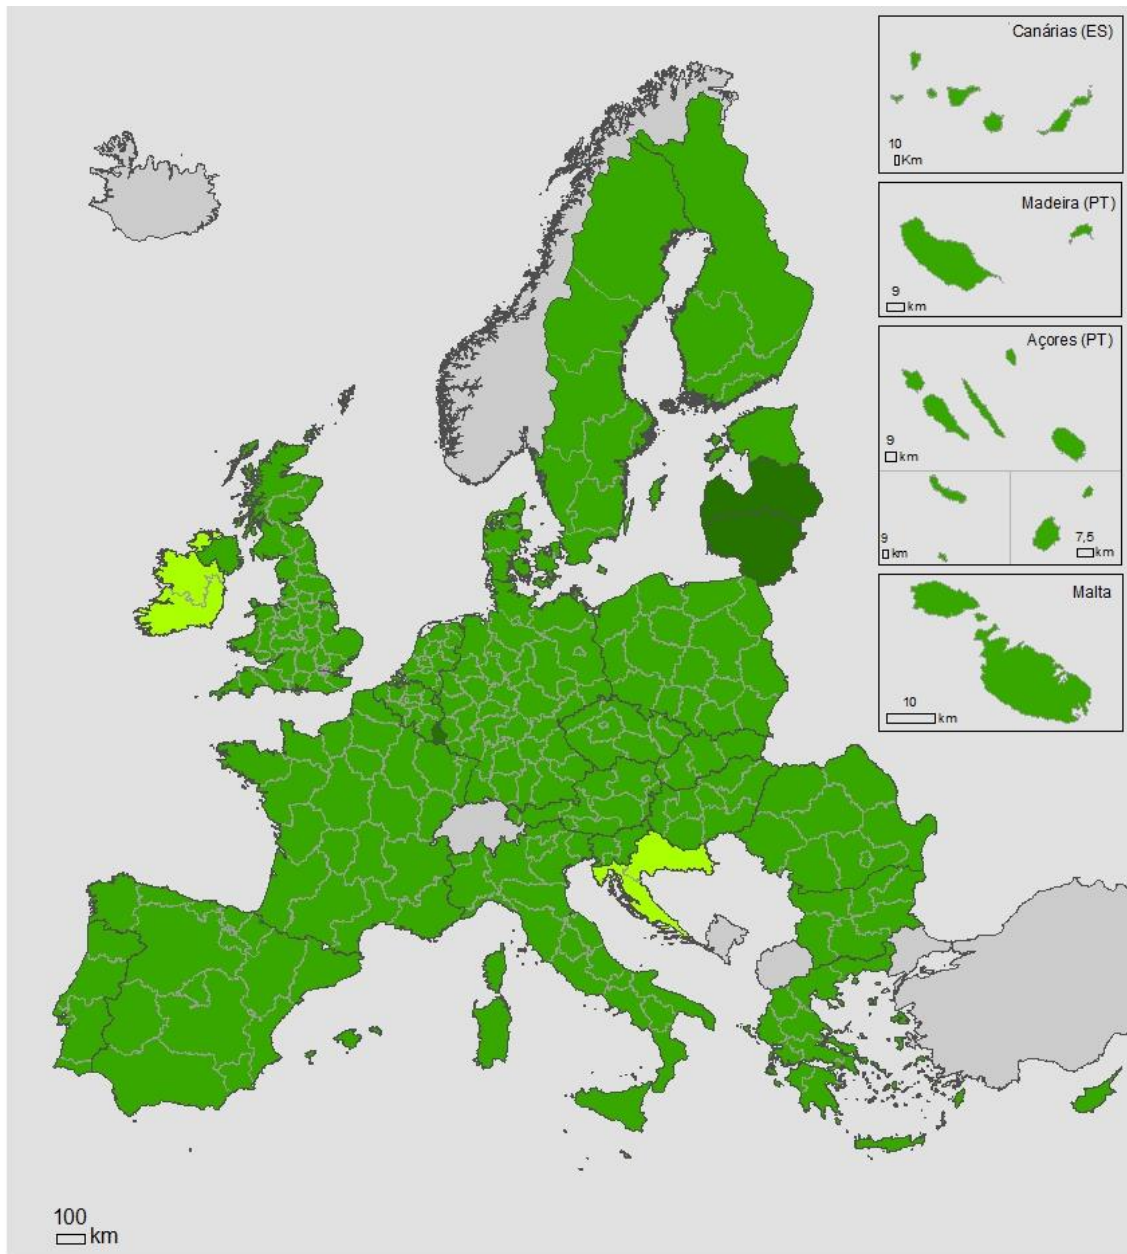

**EURO-HEALTHY PHI indicators availability score**

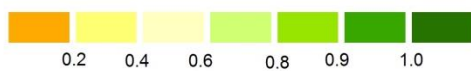

— NUTS 2    — EU 28

5  
6  
7  
8

1 Regional availability score by area of concern: Education

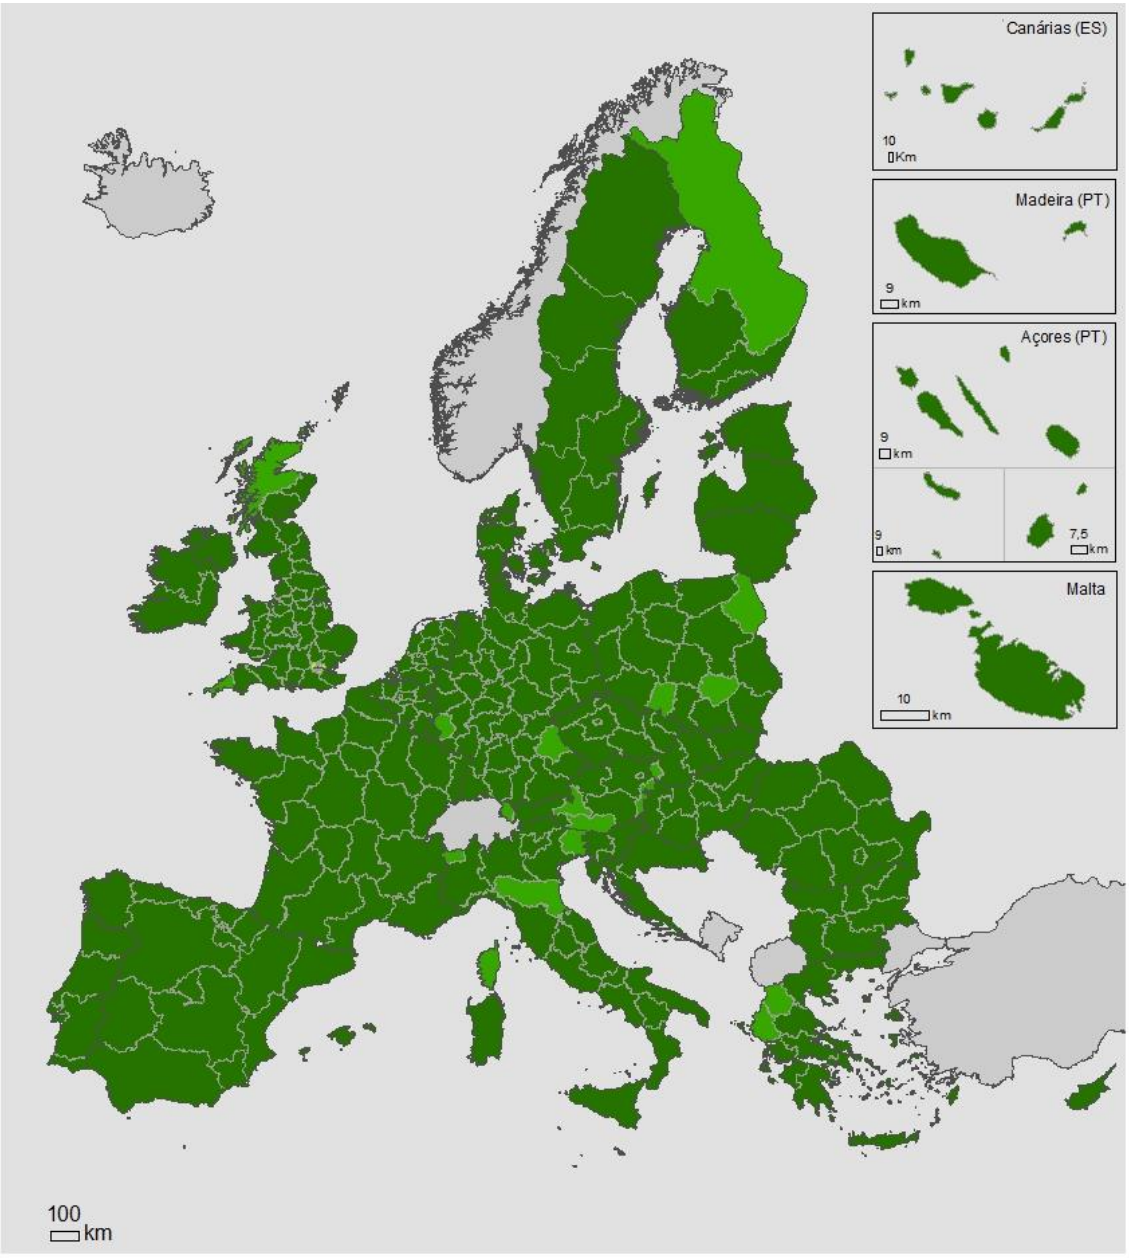

2

3

4

5

EURO-HEALTHY PHI indicators availability score

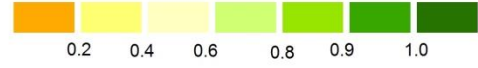

NUTS 2 EU 28

1 Regional availability score by area of concern: Demographic change

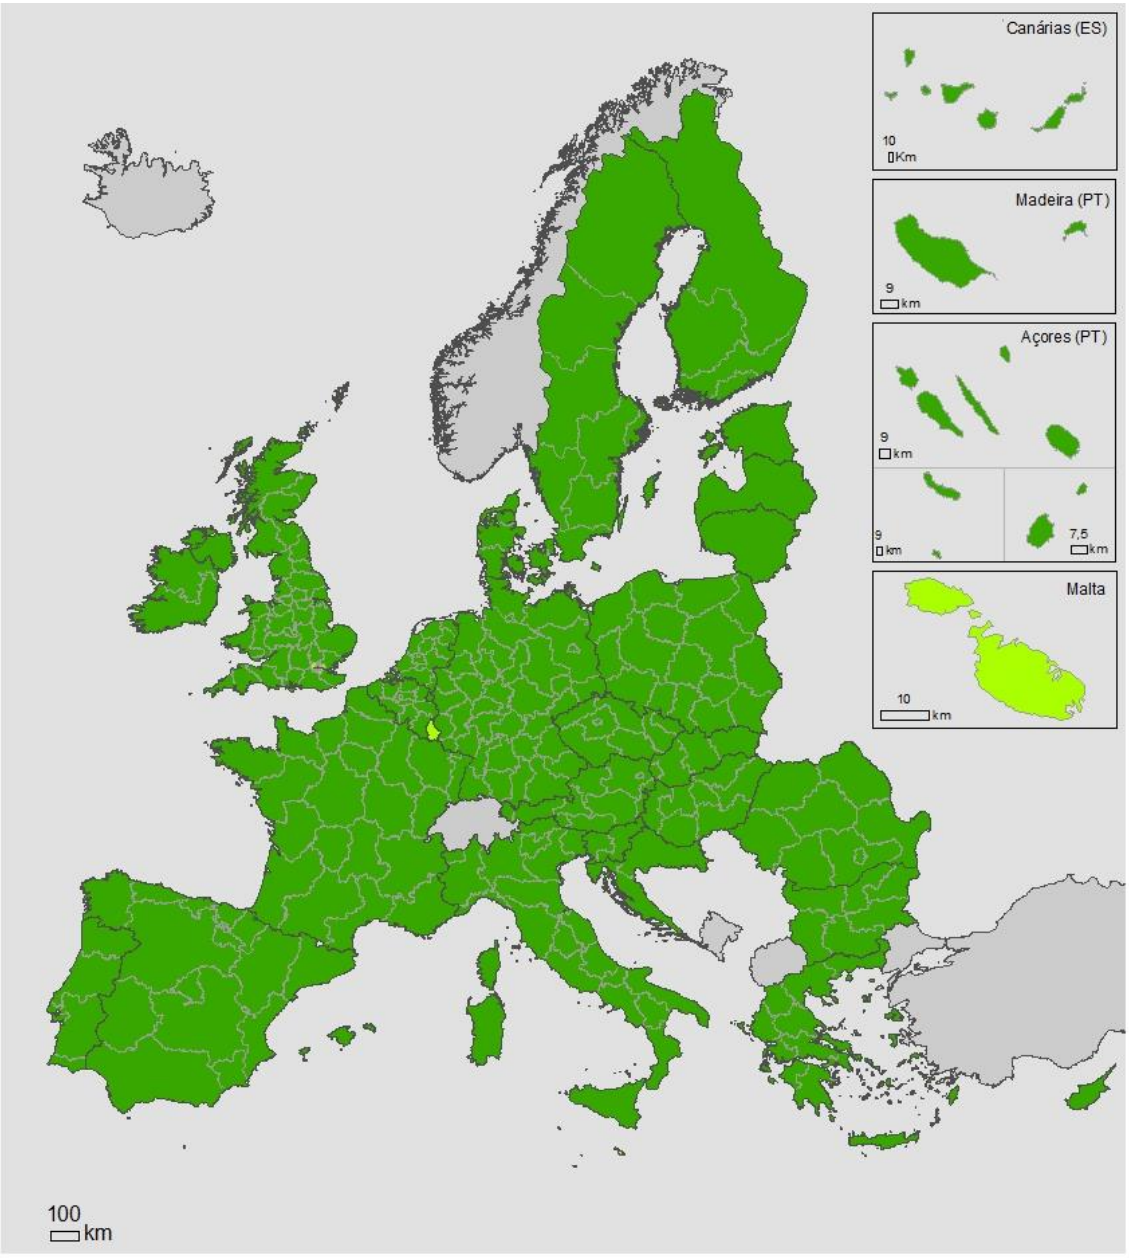

2

EURO-HEALTHY PHI indicators availability score

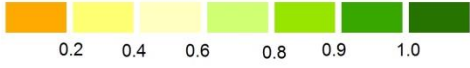

NUTS 2 EU 28

3  
4  
5



1 Regional availability score by area of concern: Lifestyle and health behaviours

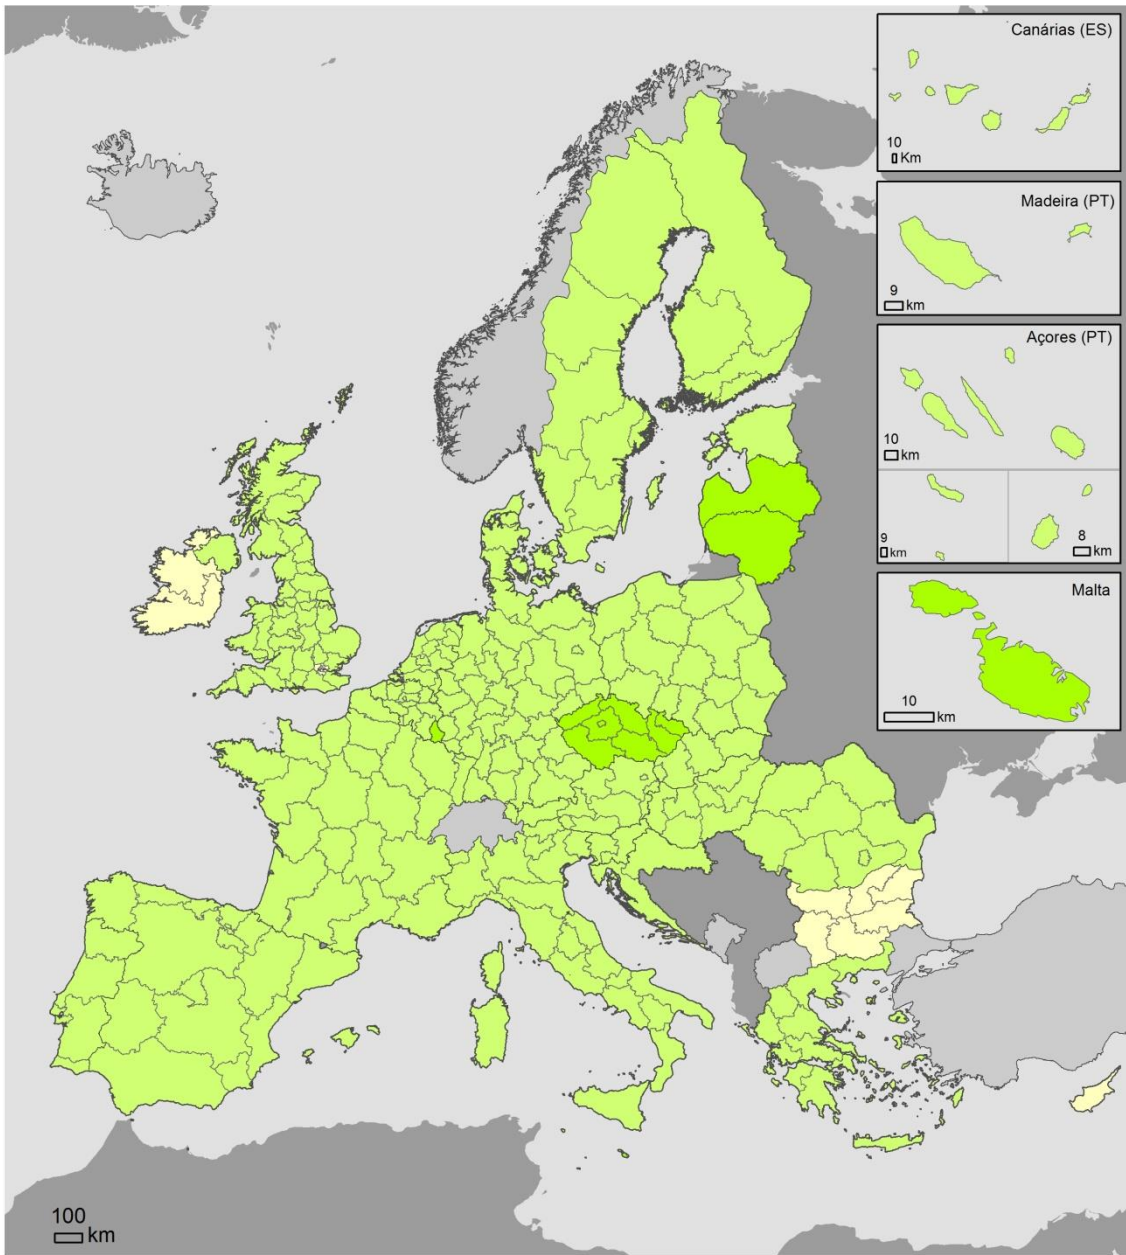

EURO-HEALTHY PHI indicators availability score

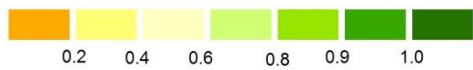

NUTS 2 EU 28

- 2
- 3
- 4

1 Regional availability score by area of concern: Physical Environment

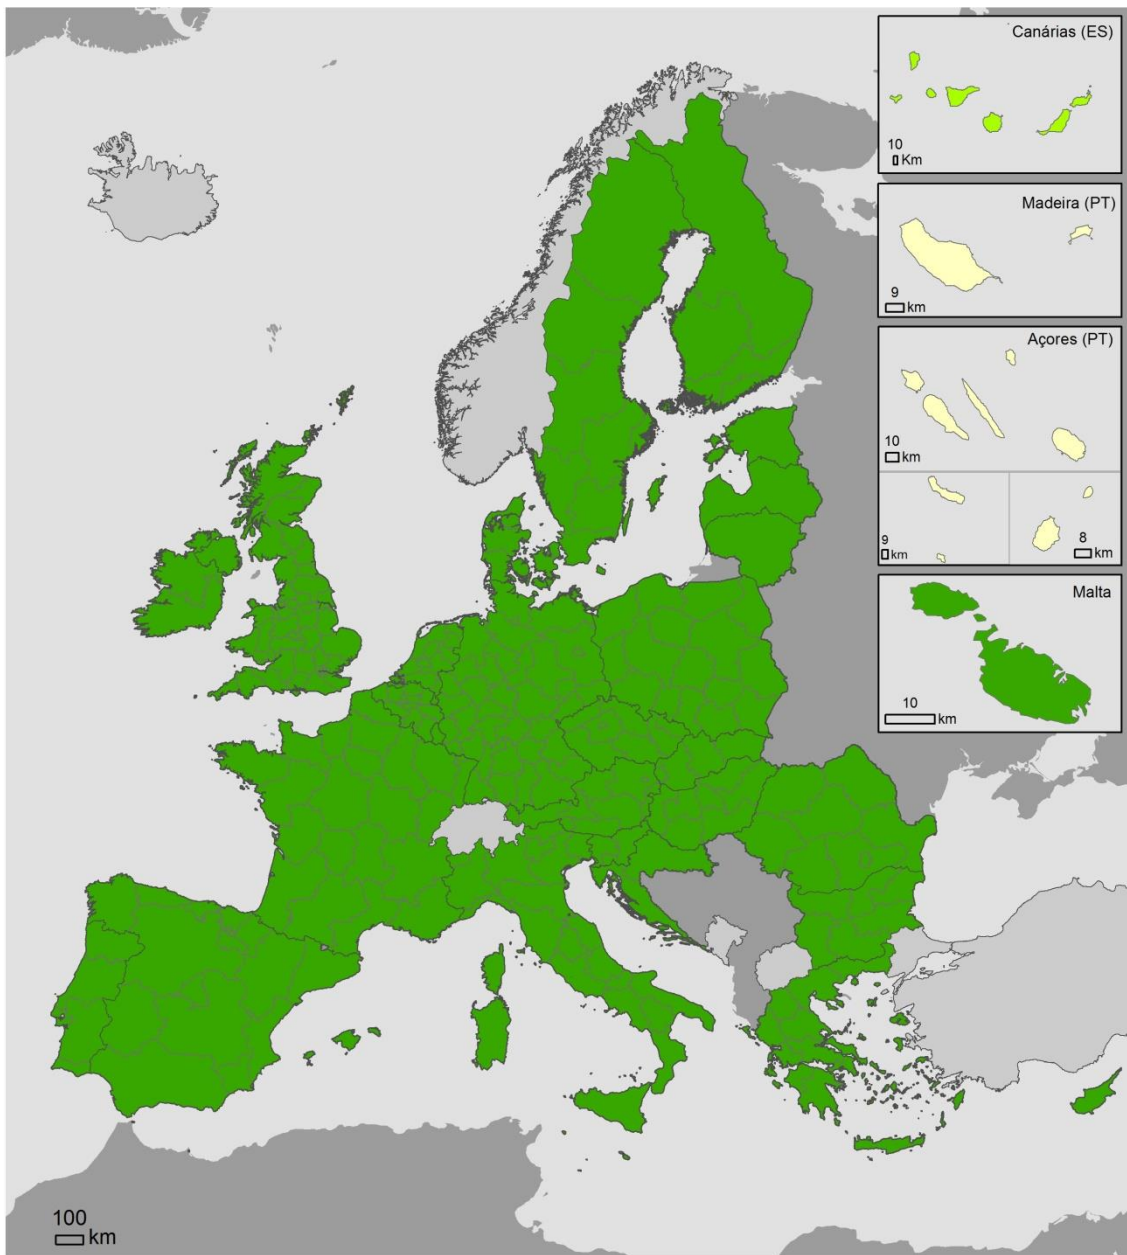

EURO-HEALTHY PHI indicators availability score

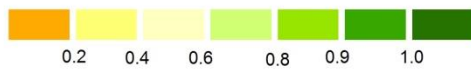

NUTS 2 EU 28

- 2
- 3
- 4

1 Regional availability score by area of concern: Built Environment

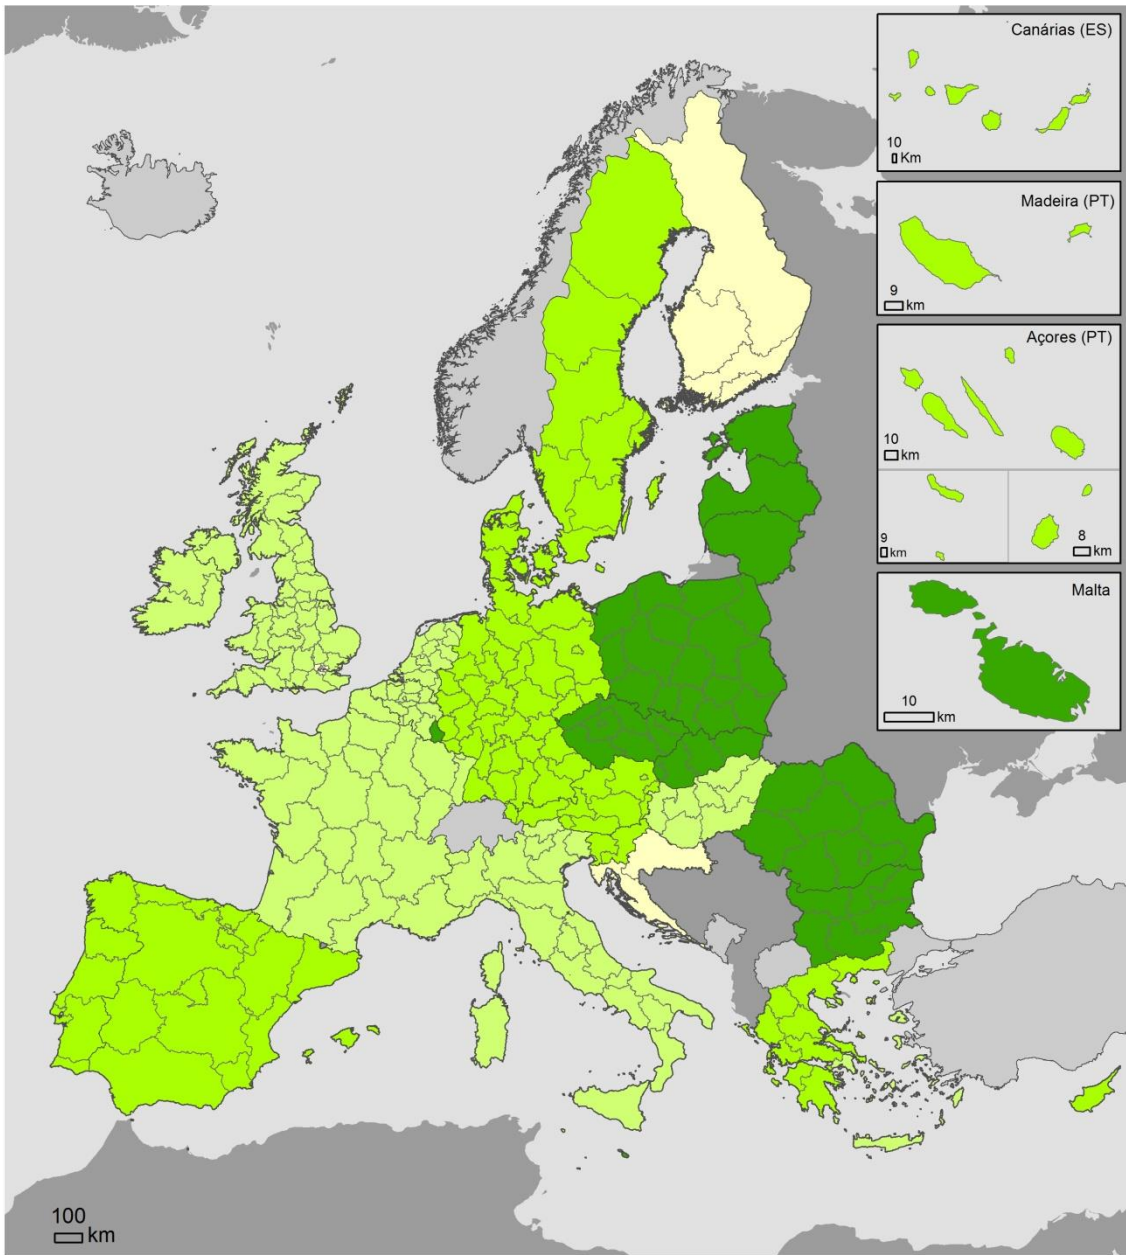

EURO-HEALTHY PHI indicators availability score

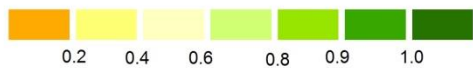

NUTS 2 EU 28

- 2
- 3
- 4

1 Regional availability score by area of concern: Road Safety

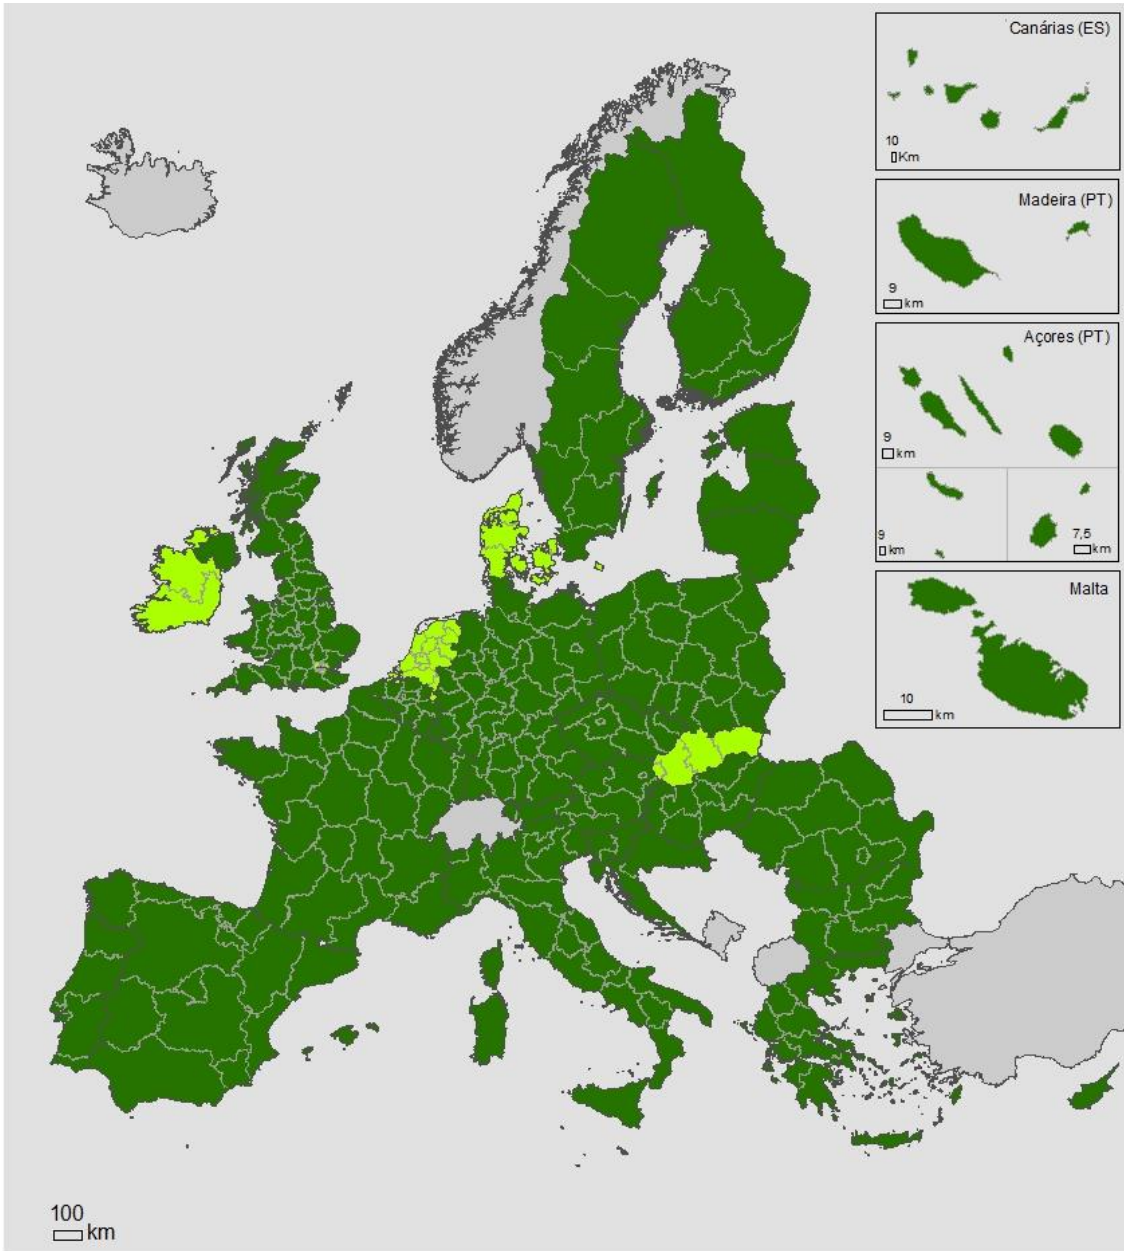

2

**EURO-HEALTHY PHI indicators availability score**

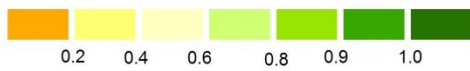

NUTS 2 EU 28

3

4

5



1 Regional availability score by area of concern: Healthcare resources and expenditure

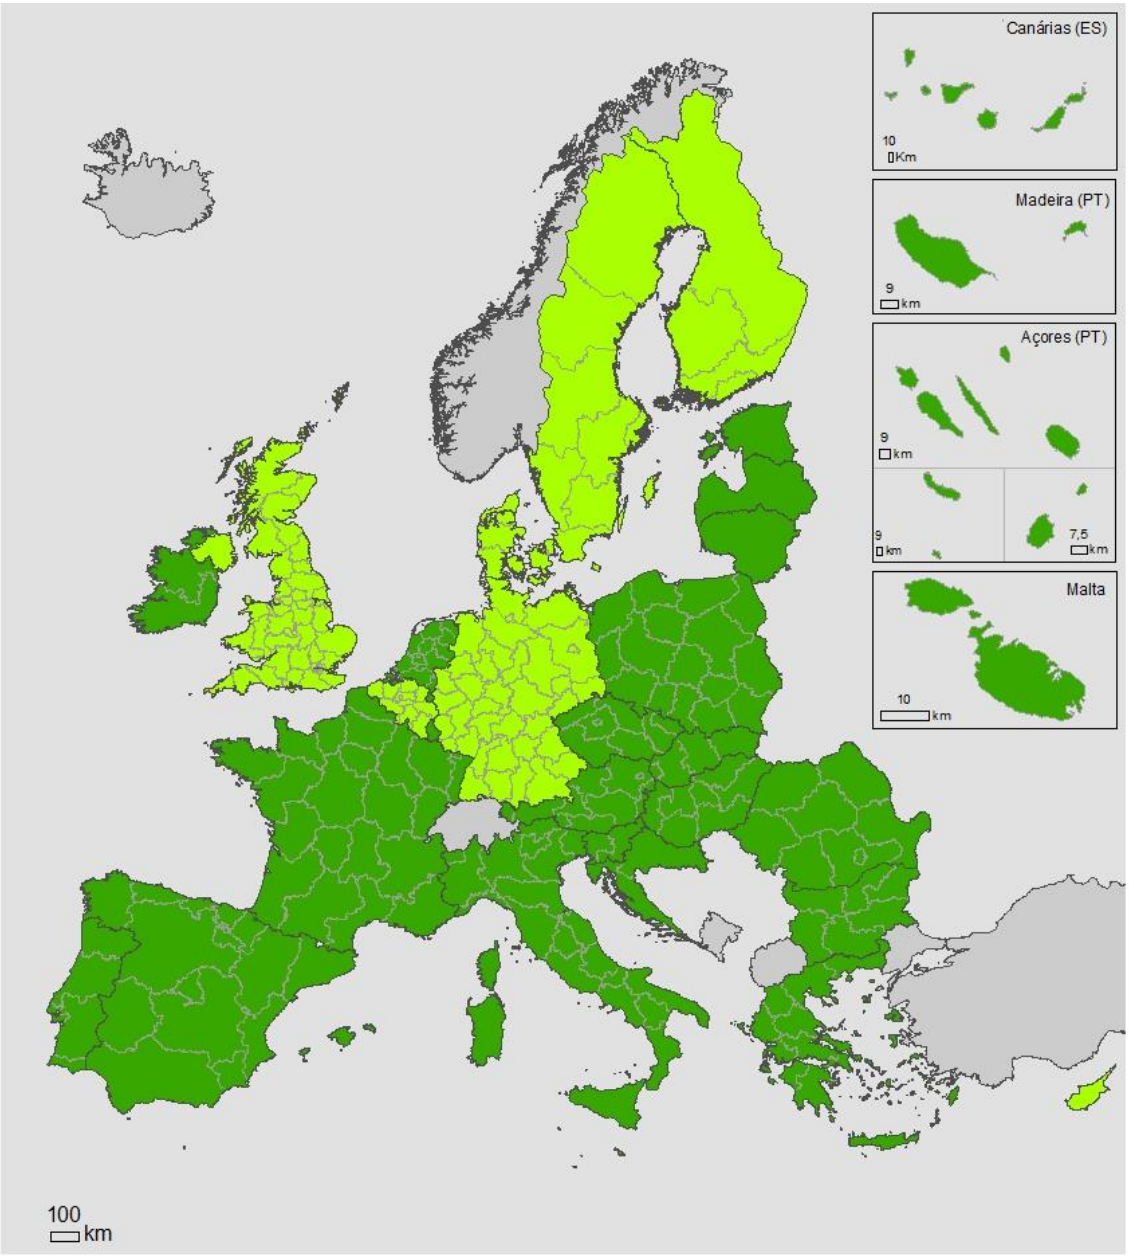

2

EURO-HEALTHY PHI indicators availability score

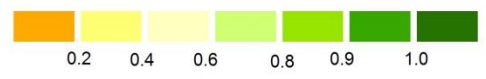

3

NUTS 2 EU 28

4



1 Regional availability score by area of concern: Healthcare performance

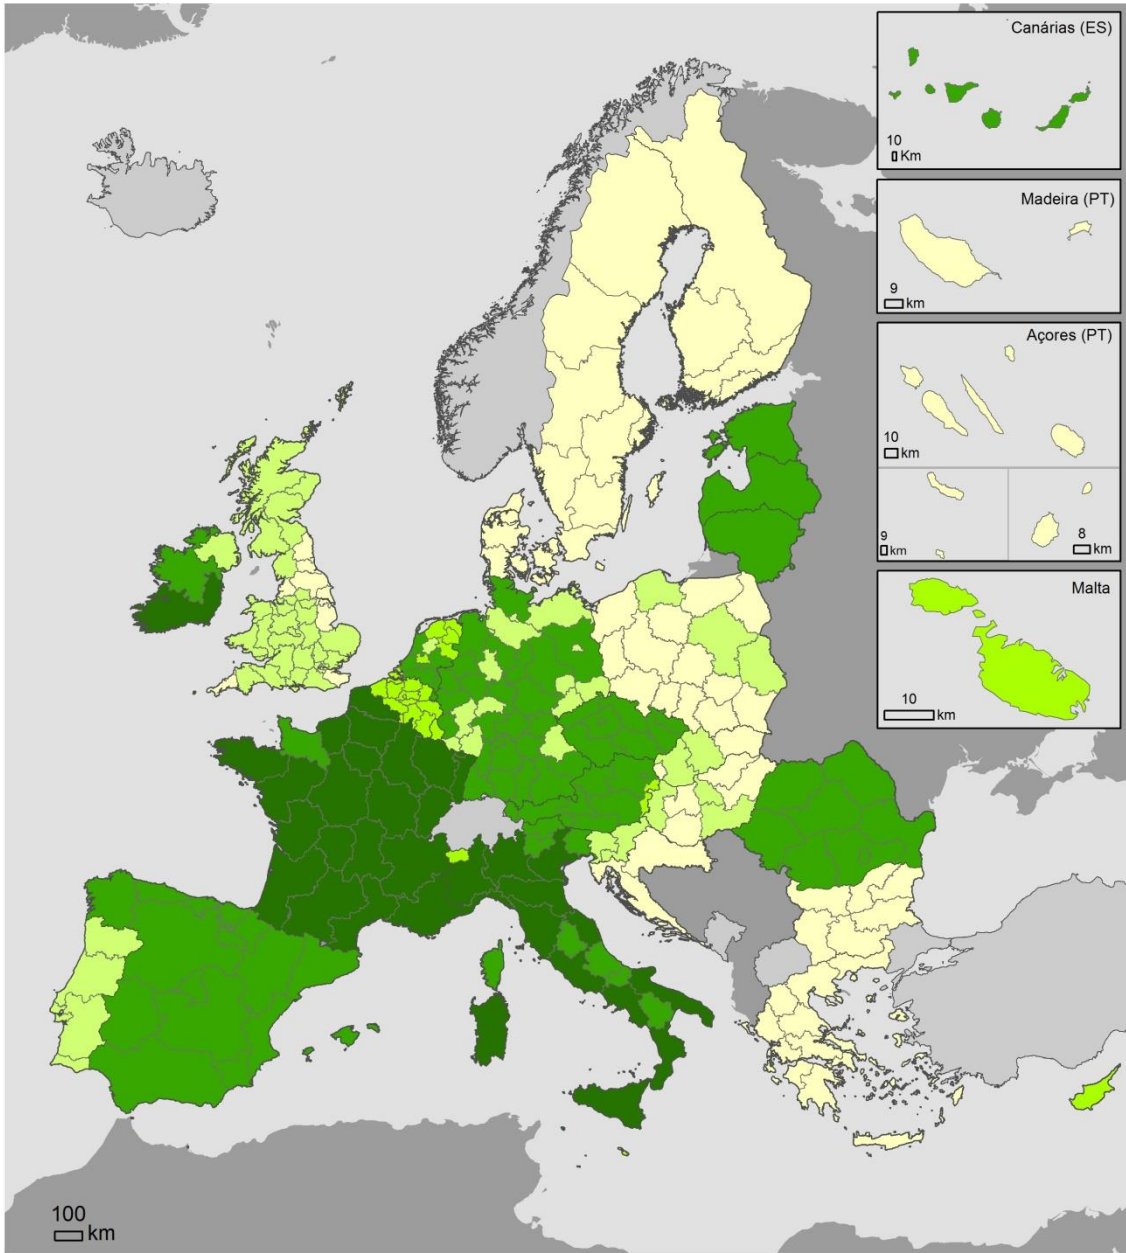

EURO-HEALTHY PHI indicators availability score

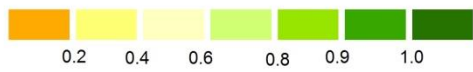

NUTS 2 EU 28

- 2
- 3
- 4

1 Regional availability score by area of concern: Health Outcomes

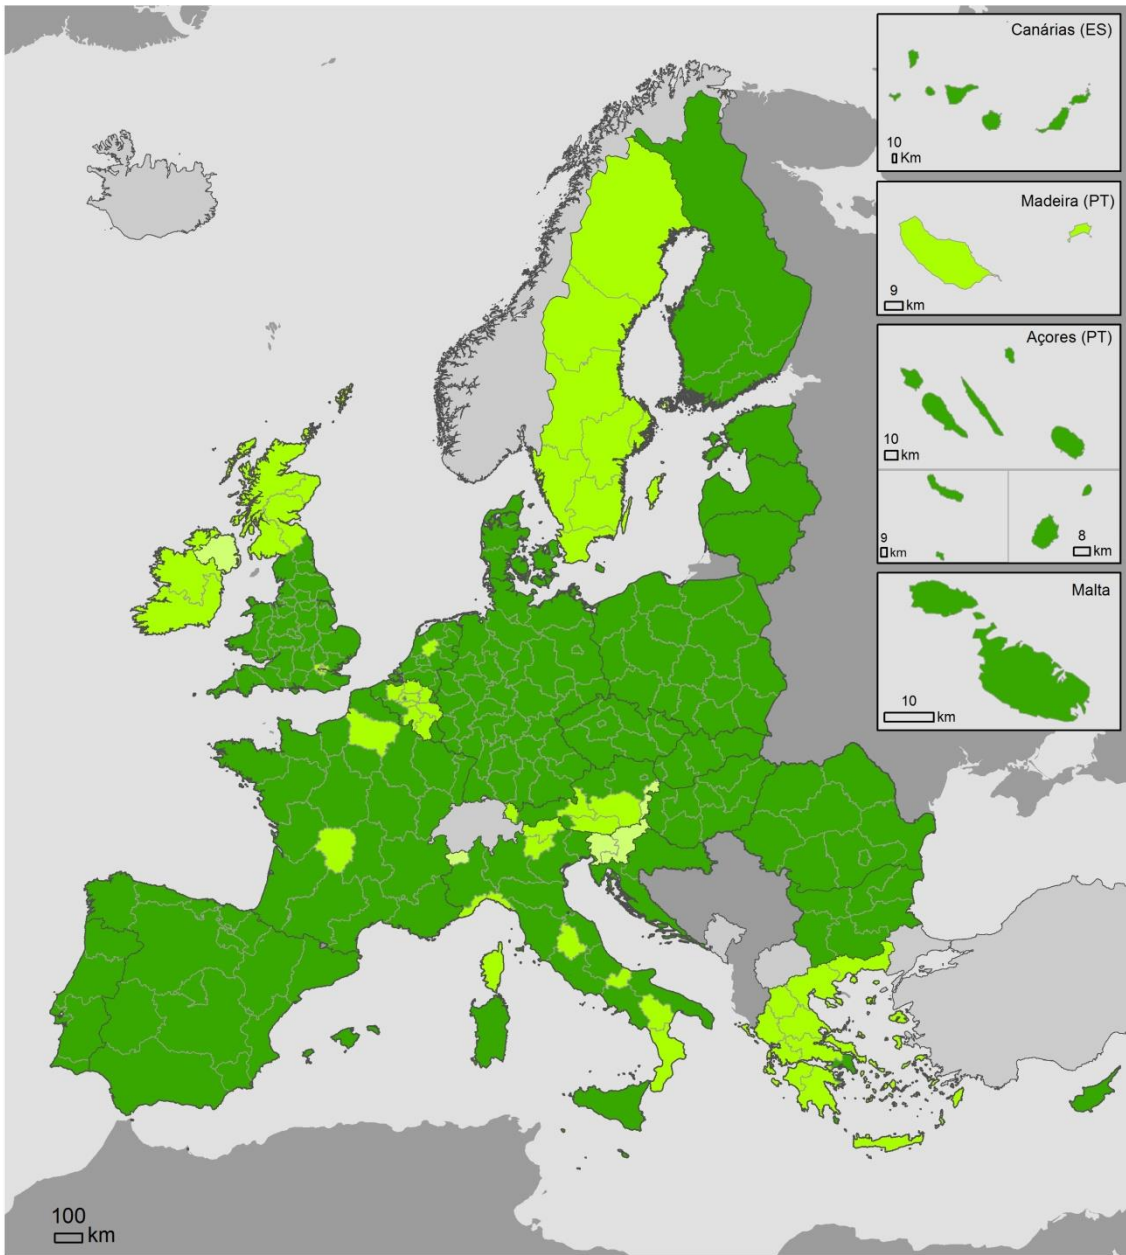

EURO-HEALTHY PHI indicators availability score

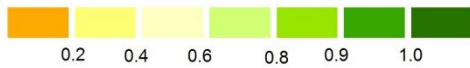

NUTS 2 EU 28

2
